# Supplementary material
Source: Springer Nature journal article supplement (https://www.springermedizin.de/resource/supplementary/12911_2008_214_MOESM1_ESM.pdf/9527392)
Supplement: MOESM1 [file 9527392]

Vraag: hypertensie

- Eenvoudig 
  Uitgebreid 
  Details 
  Spelling 
  Mesh

| In dit veld:         | zoeken naar deze woorden:                |                                     |
|----------------------|------------------------------------------|-------------------------------------|
| Alle velden:         | <input type="text" value="hypertensie"/> | <input type="button" value="Leeg"/> |
| Auteur(s):           | <input type="text"/>                     | <input type="button" value="Leeg"/> |
| Titel:               | <input type="text"/>                     | <input type="button" value="Leeg"/> |
| Titel plus abstract: | <input type="text"/>                     | <input type="button" value="Leeg"/> |
| Tekst:               | <input type="text"/>                     | <input type="button" value="Leeg"/> |

Alle publicatiesoorten  
 Alle leeftijden  
 Mensen en dieren

Publicatiedatum:  tot  (formaat: YYYY/MM/DD, maand en dag zijn optioneel.)

### Zoeken mbv Clinical Queries

Hierbij wordt gebruik gemaakt van zoekfilters gebaseerd op het werk van Haynes RB et. al.

Clinical Query zoekfilter gebruiken

Items 1 - 10 van 286142;  per pagina.

[Impaired glucose regulation and type 2 diabetes in children and adolescents.](#)

*Kempf K, Rathmann W, Herder C.*  
 Diabetes Metab Res Rev, Volume , Issue , Jun 2008  
 PMID: 18551709, [Gerelateerde artikelen](#)

[Lymph node pathology in pulmonary veno-occlusive disease and pulmonary capillary hemangiomas.](#)

*Thomas de Montpréville V, Dulmet E, Fadel E, Dartevelle P.*  
 Virchows Arch, Volume , Issue , Jun 2008  
 PMID: 18551306, [Gerelateerde artikelen](#)

[Ectopic varices leading to occult haemorrhage in portal hypertension: a surgical quandary.](#)

*Andrabi SI, Ahmad J, Clements WB.*  
 N Z Med J, Volume 121, Issue 1275, 2008  
 PMID: 18551155, [Gerelateerde artikelen](#)

[Limited value of cyclosporine A for the treatment of patients with uveitis associated with juvenile idiopathic arthritis.](#)

*Tappeiner C, Roessel M, Heinz C, Michels H, Ganser G, Heiligenhaus A.*  
 Eye, Volume , Issue , Jun 2008  
 PMID: 18551142, [Gerelateerde artikelen](#)

[Quercetin Ameliorates Metabolic Syndrome and Improves the Inflammatory Status in Obese Zucker Rats.](#)

*Rivera L, Morón R, Sánchez M, Zarzuelo A, Galisteo M.*  
 Obesity (Silver Spring), Volume , Issue , Jun 2008  
 PMID: 18551111, [Gerelateerde artikelen](#)

[Interaction of G-protein beta\(3\) Subunit and Nitric Oxide Synthase Gene Polymorphisms on Carotid Artery Intima-media Thickness in Young Adults: The Bogalusa Heart Study.](#)

*Bhuiyan AR, Chen W, Srinivasan SR, Rice JC, Mock NB, Tang R, Gene Bond M, Boerwinkle E, Berenson GS.*  
 Am J Hypertens, Volume , Issue , Jun 2008  
 PMID: 18551105, [Gerelateerde artikelen](#)
